# Supplementary material for: TCF19 Impacts a Network of Inflammatory and DNA Damage Response Genes in the Pancreatic β-Cell
Source: MDPI journal article supplement (doi:10.3390/metabo11080513), 2021-08-04
Supplement: s1 [file s1]

**Supplementary Table S2: Primer sequences used for real-time PCR experiments**

| <b>Gene</b>                         | <b>5' Primer</b>             | <b>3' Primer</b>               |
|-------------------------------------|------------------------------|--------------------------------|
| <b>Human parp9</b>                  | GGCAGACGGCAGATGTAATTG        | GAAACTGTTTAGCCTTTGTGGC<br>AAG  |
| <b>Human dtx3l</b>                  | TCAGTGAAAGGGCAGCTAAGG        | GAAATTTGAGGTCTCGTGTTC<br>TC    |
| <b>Human ddx60</b>                  | CTTCAAGGATGCCGAGTATGC<br>GT  | CTTCCAAGAACTTCCCCACTC<br>T     |
| <b>Human mx1</b>                    | GGAAATTAATAAAGCCCAGAAT<br>G  | AAGATTCCGATGGTCCTGTC           |
| <b>Human usp18</b>                  | TGTGCACTTGGTGGAGAGAC         | GAAAGTGGGAGGGTGAGCAT           |
| <b>Human Tcf19</b>                  | AGAAACTCCGTGTAGACAAAG<br>CCC | ATGGAACCAGACGTCACAGCC<br>AT    |
| <b>Rat ccnA1</b>                    | AACCACCAACCAGTTCCTCCTT<br>CA | TCCAGAAGGCTCAGTTCTGCAA<br>CA   |
| <b>Rat ccnA2</b>                    | ATGAAGAGGCAGCCAGACATC<br>ACT | ACAGCCAAATGCAGGGTCTCAT<br>TC   |
| <b>Rat ccnB1</b>                    | TGTGTCAGGCTTTCTCCGATG<br>TGA | TTTCCAGTGACTTCACGACCCA<br>GT   |
| <b>Rat ccnD1</b>                    | TGCTGCAAATGGAAGTCTTC<br>TGG  | AAGGTCTGTGCATGTTTGCGGA<br>TG   |
| <b>Rat ccnD2</b>                    | ACTTCAAGTTTGCCATGTACCG<br>CG | TTAAGCAGCACAGCCTCGATTT<br>GC   |
| <b>Rat ccnD3</b>                    | TCCTGCAATTTGGATCTGGGT<br>CCT | ACCCTCAACCACAGAAGCATAG<br>CA   |
| <b>Rat ccnE1</b>                    | TTCCCATGGAAGACTCCCACA<br>ACA | ATGGCAGGTCTGGTCATTCTGT<br>CT   |
| <b>Rat ccnE2</b>                    | AACCAGCCAGACTCTCCACAA<br>GAA | TGCAAGGACTGATTCTCTCCA<br>ACA   |
| <b>Rat FoxM1</b>                    | AGCTCTTCCAAGGCAAAGACA<br>GGA | TTAACCCGATTCTGCTCCAGGT<br>GA   |
| <b>Rat cdk4</b>                     | GTTGCTGCTGGAAATGCTGAC<br>CTT | GCTGCCACTTCAGCAAGGTTCT<br>TT   |
| <b>Rat Plk1</b>                     | TGCAGTACATAGAGCGTGATG<br>GCA | TGTGCGGAACCATGTTTCGTAG<br>GTA  |
| <b>Rat Ki67</b>                     | AAGAACCCACACAGATGCCCT<br>GTA | TCGCACTTTGCCTTGATGTTGG         |
| <b>Rat cdkn2c</b>                   | TGCGCTGCAGGTTATGAACT<br>TGG  | GGCAGCATCGTAAATGACAGC<br>AAA   |
| <b>Rat cdkn1a</b>                   | GCGGGACCGGGACATC             | CGCTTGGAGTGATAGAAATCTG<br>TTAG |
| <b>Rat cdkn1b</b>                   | GCCTTCAATTGGGTCTCAGGC<br>AAA | AAGAATCTTCTGCCGCAGGTC<br>G     |
| <b>Human and rat beta<br/>actin</b> | TCAAGATCATTGCTCCTGAGC        | TTGCTGATCCACATCTGCTGGA<br>AG   |
